# Supplementary material for: An off-on-off fluorescence probe based on a pyrazole derivative for Al3+ and Fe3+ detection
Source: Royal Society of Chemistry journal article supplement (doi:10.1039/d2nj05301b), 2022-11-25
Supplement: d2nj05301b1.pdf [file d2nj05301b1.pdf]

Electronic Supplementary Material (ESI) for New Journal of Chemistry.

## Supporting Information

An off-on-off fluorescence probe based on pyrazole derivative for Al<sup>3+</sup> and Fe<sup>3+</sup>

Kehui Wei<sup>a</sup>, Sheyun Lyu<sup>b</sup>, Yuanying Liu<sup>a</sup>, Mingyi Kang<sup>a</sup>, Peng Liu<sup>a</sup>, Xiaofeng Yang<sup>a</sup>, Meishan Pei<sup>a</sup>  
and Guangyou Zhang<sup>a,\*</sup>

<sup>a</sup> School of chemistry and chemical engineering, University of Jinan, Jinan 250022, China. E-mail address: [chm\\_zhanggy@ujn.edu.cn](mailto:chm_zhanggy@ujn.edu.cn).

<sup>b</sup> Henan Sanmenxia Aoke Chemical Industry Co. Ltd., Sanmenxia 472000, China. E-mail address: [lsy13525237769@163.com](mailto:lsy13525237769@163.com).

**\*Corresponding author:** Guangyou Zhang, E-mail address: [chm\\_zhanggy@ujn.edu.cn](mailto:chm_zhanggy@ujn.edu.cn).

## Table of Contents

1. **Figure. S1.**  $^1\text{H}$  NMR spectra of compound **L**.
2. **Figure. S2.**  $^{13}\text{C}$  NMR spectra of compound **L**.
3. **Figure. S3.** FTIR spectra of compound **L**.
4. **Figure. S4.** ESI-MS spectra of compound **L**.
5. **Figure. S5.** UV-vis absorption spectra of **L** upon addition of various metal ions.
6. **Figure. S6.** Benesi-Hildebrand curve assuming 1:2 stoichiometry for association between **L** and  $\text{Al}^{3+}$ .
7. **Figure. S7.** Absorption spectrum of **L** ( $1 \times 10^{-5}$  M) with increasing addition of  $\text{Al}^{3+}$  (0-15 equiv.).
8. **Figure. S8.** Switching cycles of fluorescence intensity of **L** aqueous solutions at 503 nm by alternate addition of  $\text{Al}^{3+}$  and PPI.
9. **Figure. S9.** Benesi-Hildebrand curve assuming 1:2 stoichiometry for association between  $\text{L}[\text{Al}^{3+}]$  and  $\text{Fe}^{3+}$ .
10. **Figure. S10.** Absorption spectrum of  $\text{L}[\text{Al}^{3+}]$  with increasing addition of  $\text{Fe}^{3+}$  (0-25 equiv.).
11. **Figure. S11.** The fluorescence intensity of  $\text{L}[\text{Al}^{3+}]$  towards  $\text{Fe}^{3+}$  in the presence of other metal ions.
12. **Figure. S12.** UV-vis absorption spectra of  $\text{L}[\text{Al}^{3+}]$  upon addition of various metal ions.
13. **Figure. S13.** Job's Plot of **L** with  $\text{Al}^{3+}$  in DMSO/ $\text{H}_2\text{O}$  buffer solution ( $v/v = 9/1$ , tris = 10 mM, pH = 7.4).
14. **Figure. S14.** Job's Plot of  $\text{L}[\text{Al}^{3+}]$  with  $\text{Fe}^{3+}$  in DMSO/ $\text{H}_2\text{O}$  buffer solution ( $v/v = 9/1$ , tris = 10 mM, pH = 7.4).
15. **Fig. S15.** ESI-MS of compound **L** with addition of  $\text{Al}^{3+}$ .
16. **Fig. S16.** ESI-MS of compound **L** with addition of  $\text{Fe}^{3+}$ .

17. **Fig. S17.** FTIR of compound **L** with addition of  $\text{Al}^{3+}$ .
18. **Fig. S18.** The optimized geometry of **L**,  $\text{L}[\text{Al}^{3+}]$  and  $\text{L}[\text{Fe}^{3+}]$ .
19. **Table S1.** Comparison to this work with the published sensors for  $\text{Al}^{3+}$  detection.
20. **Table S2.** Comparison to this work with the published sensors for  $\text{Fe}^{3+}$  detection.
21. **Table S3.** Optical properties of **L** in the absence/presence of  $\text{Al}^{3+}$  or  $\text{Fe}^{3+}$ .
22. **Table S4.** Determination of **L** to  $\text{Al}^{3+}$  and  $\text{Fe}^{3+}$  in tap water.

### Calculation of quantum yield

The quantum yield was calculated according to the following formula (1):

$$\Phi_u = \Phi_s \frac{F_u A_s n_u^2}{F_s A_u n_s^2} \quad (1)$$

$\Phi$ ,  $F$ ,  $A$ , and  $n$  represent the quantum yield, the integrated area under the corrected emission spectra, the absorbance intensity at the excitation wavelength and the refractive index of solvent, respectively. In addition,  $s$  refers to rhodamine B as the standard, and  $u$  refers to the target. The quantum yield ( $\Phi$ ) of rhodamine B dissolved in anhydrous ethanol is 0.97.

### Calculation of detection limit

The detection limits of **L** for  $\text{Al}^{3+}$  were calculated by the following formula (2):

$$LOD = 3\sigma/s \quad (2)$$

where  $\sigma$  is the standard deviation of 10 times the intensity of free **L** ( $\text{L}[\text{Al}^{3+}]$ ,  $\text{L}[\text{Fe}^{3+}]$ ), and  $s$  is the slope of the emission intensity of **L** ( $\text{L}[\text{Al}^{3+}]$ ,  $\text{L}[\text{Fe}^{3+}]$ ) as a function of the  $\text{Al}^{3+}$  or  $\text{Fe}^{3+}$  concentration.

### Calculation of association constant

The association constant between **L** and  $\text{Al}^{3+}$  was calculated by the following formula (3) and the association constant between  $\text{L}[\text{Al}^{3+}]$  and  $\text{Fe}^{3+}$  was calculated by the following formula (4):

$$\frac{1}{\Delta F} = \frac{1}{\Delta F_{max}} + \frac{1}{K\Delta F_{max}} \cdot \frac{1}{[\text{Al}^{3+}]^2} \quad (3)$$

$$\frac{1}{\Delta F} = \frac{1}{\Delta F_{max}} + \frac{1}{K\Delta F_{max}} \cdot \frac{1}{[\text{Fe}^{3+}]^2} \quad (4)$$

where  $\Delta F = F - F_0$  and  $\Delta F_{max} = F_{max} - F_0$ .

with  $F_0$ ,  $F$  and  $F_{max}$  being the fluorescence intensities of the free **L**, at various concentration of  $\text{Al}^{3+}$  and at the maximum concentration of  $\text{Al}^{3+}$  respectively.

with  $F_0$ ,  $F$  and  $F_{max}$  being the fluorescence intensities of the  $\text{L}[\text{Al}^{3+}]$ , at various concentration of  $\text{Fe}^{3+}$

and at the maximum concentration of  $\text{Fe}^{3+}$  respectively.

### **Theoretical calculation**

Density functional theory (DFT) structure optimization was performed using the Gaussian 09 program. In all cases, the structures were optimized using the B3LYP functional and the mixed basis set 6-31+G(d). For all optimized structures, frequency calculations were performed to confirm the absence of imaginary frequencies. Subsequently, TD-DFT calculations were performed based on B3LYP/6-31G\* and B3LYP/LANL2DZ to obtain the corresponding molecular orbitals and energy calculations. According to the calculation results of DFT/TD-DFT, the reaction mechanism of **L** with  $\text{Al}^{3+}$  and  $\text{Fe}^{3+}$  ions was further proposed.

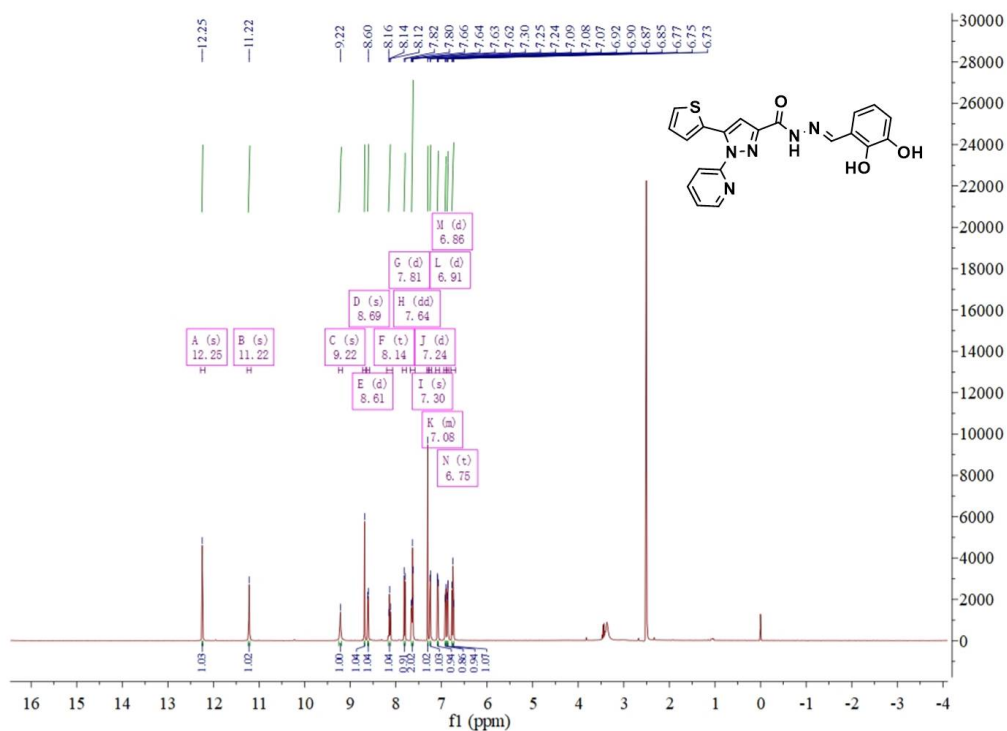

Fig. S1  $^1\text{H}$  NMR spectra of compound L.

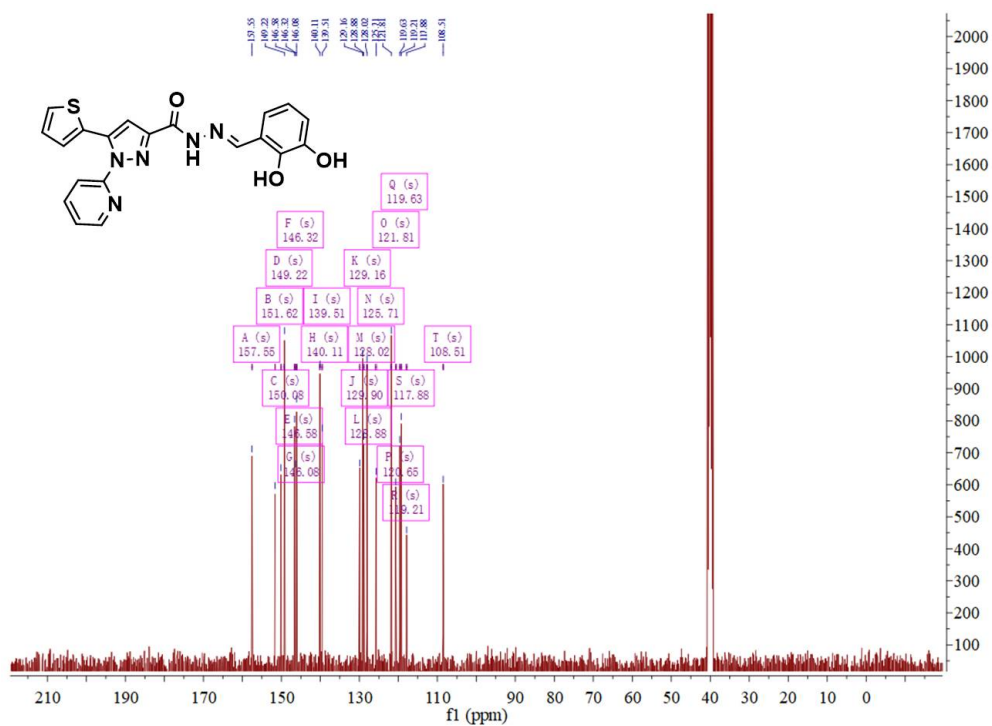

Fig. S2  $^{13}\text{C}$  NMR spectra of compound L.

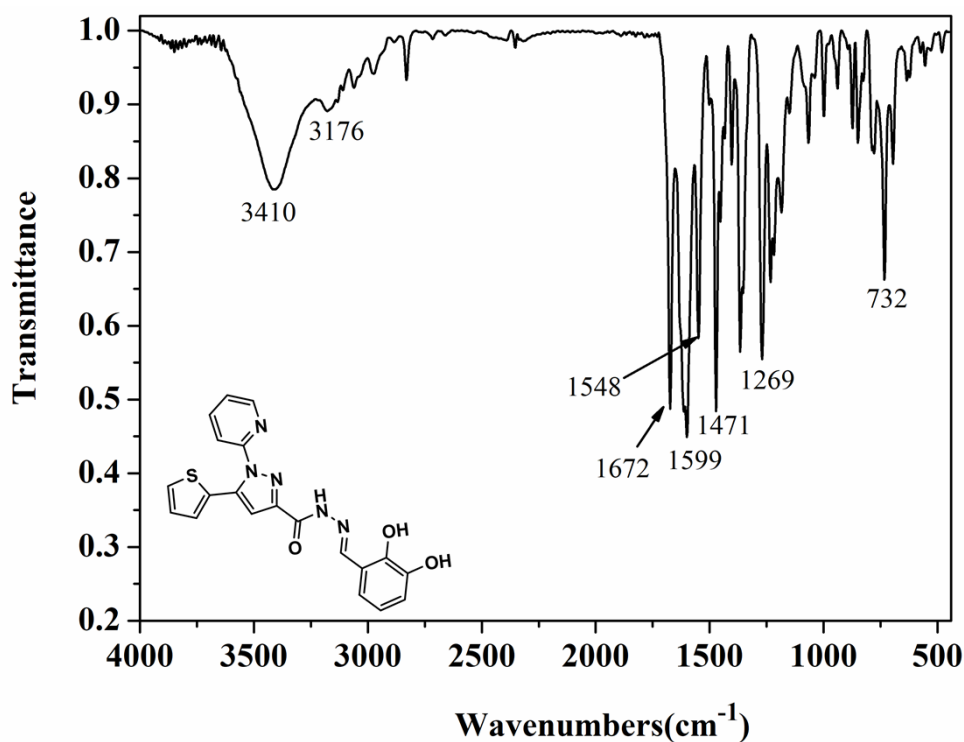

Fig. S3 FTIR spectra of compound L.

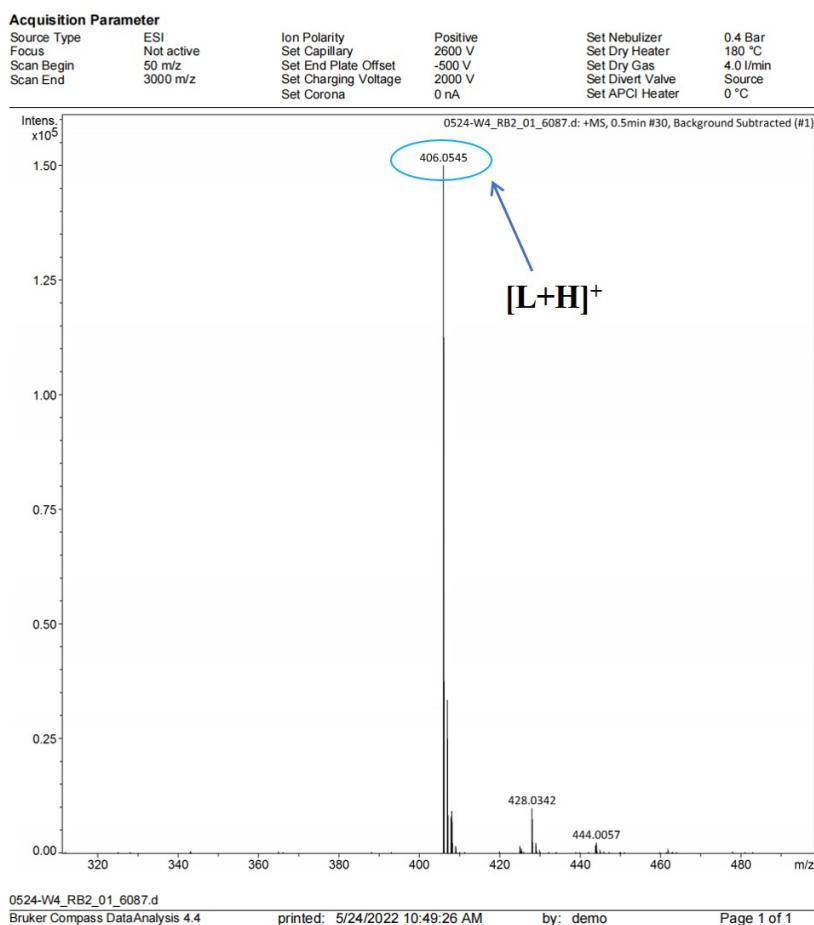

Fig. S4 ESI-MS spectra of compound L.

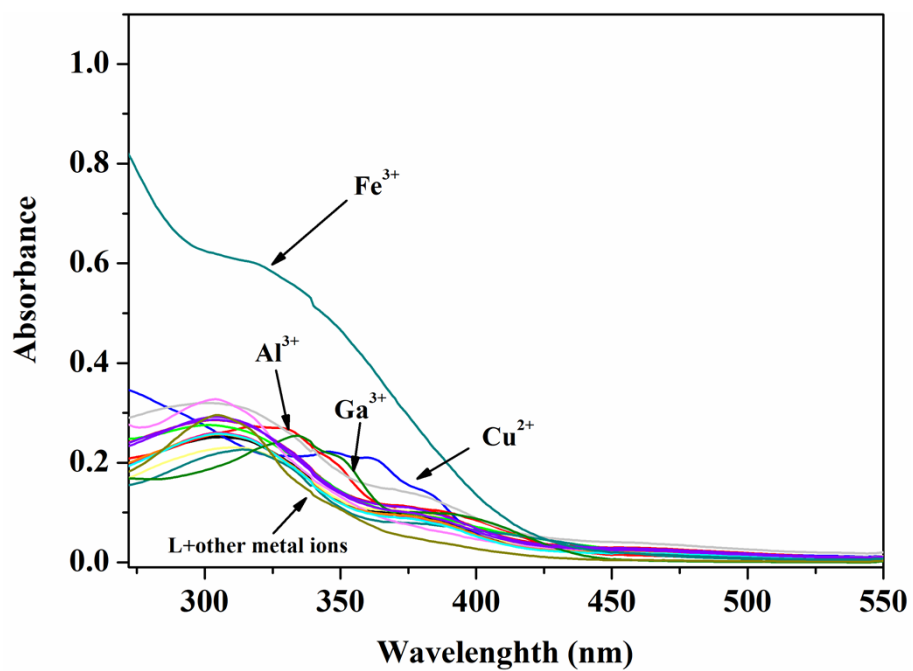

Fig. S5 UV-vis absorption spectra of L upon addition of various metal ions.

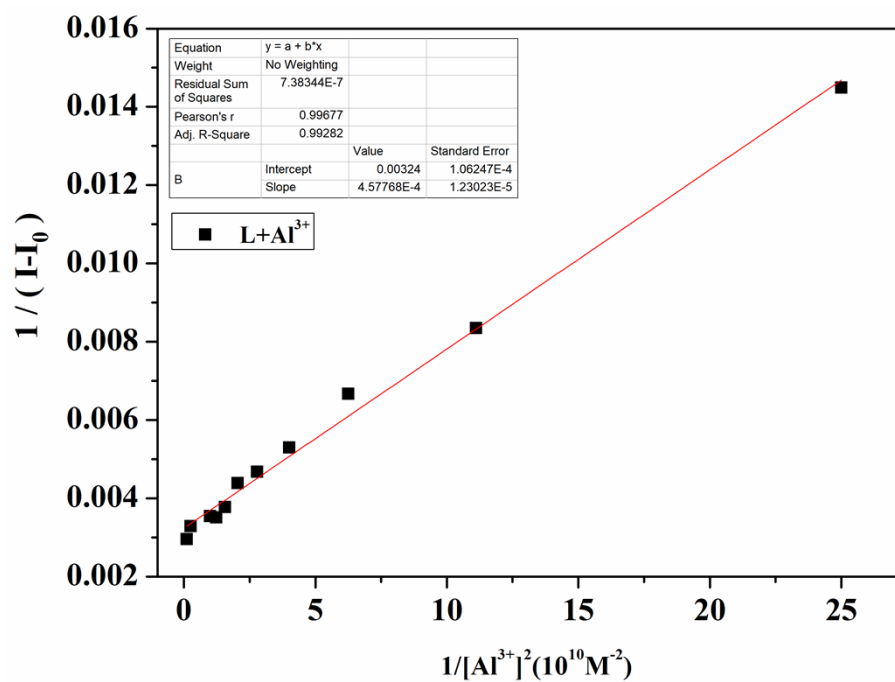

Fig. S6 Benesi-Hildebrand curve assuming 1:2 stoichiometry for association between L and Al<sup>3+</sup>.



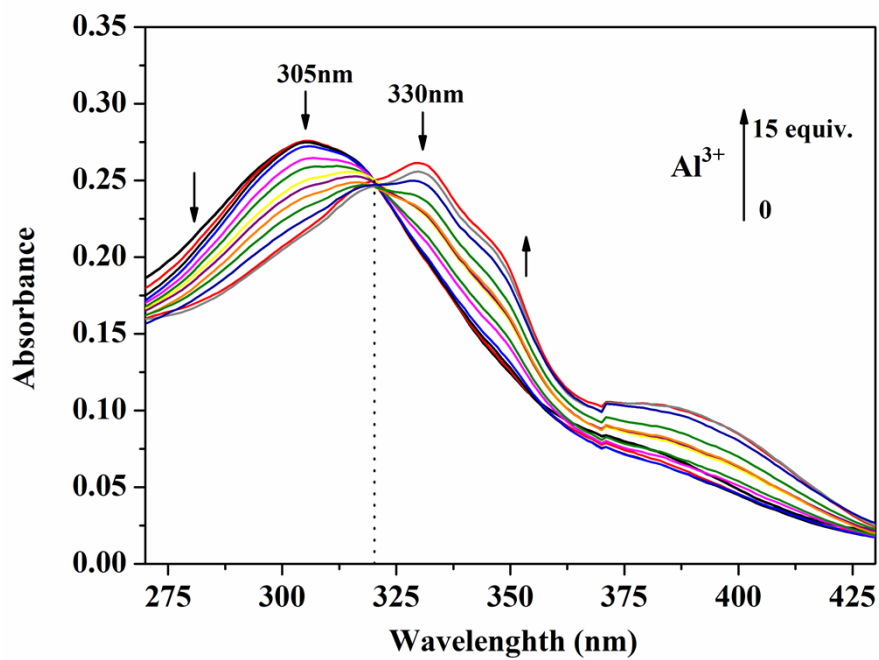

**Fig. S7** Absorption spectrum of L ( $1 \times 10^{-5}$  M) with increasing addition of Al<sup>3+</sup> (0-15 equiv.).

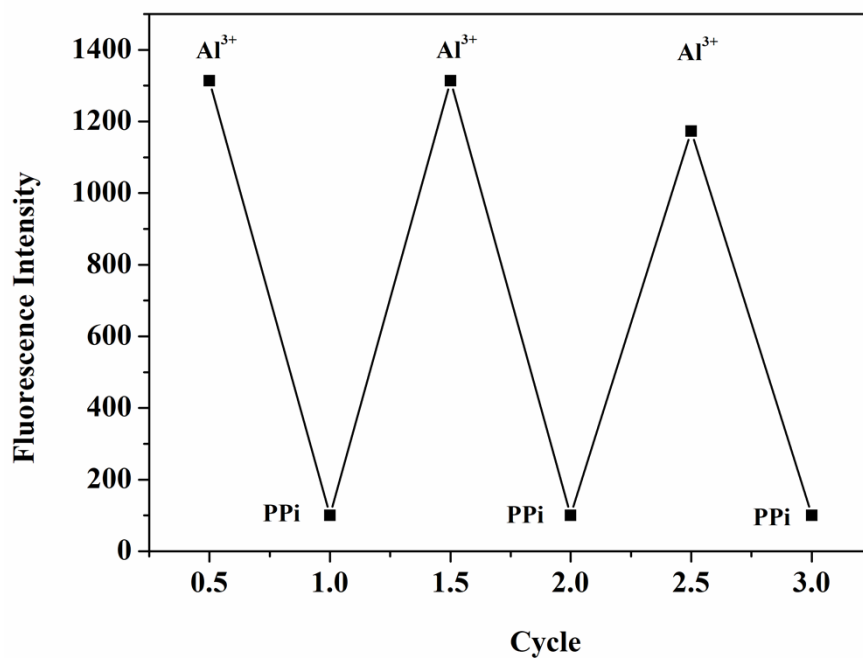

**Fig. S8** Switching cycles of fluorescence intensity of L aqueous solutions at 503 nm by alternate addition of Al<sup>3+</sup> and PPI.

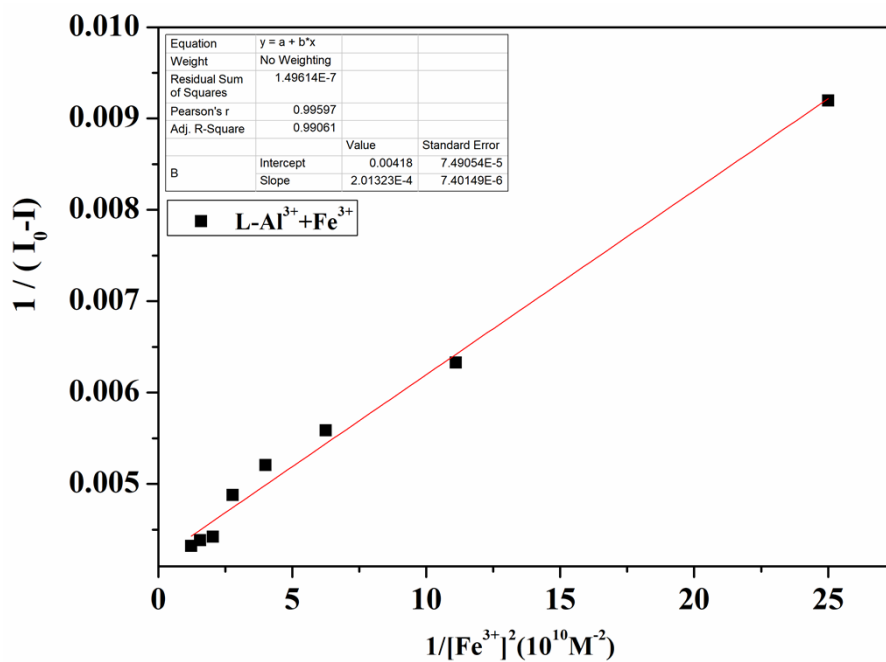

Fig. S9 Benesi-Hildebrand curve assuming 1:2 stoichiometry for association between L[Al<sup>3+</sup>] and Fe<sup>3+</sup>.

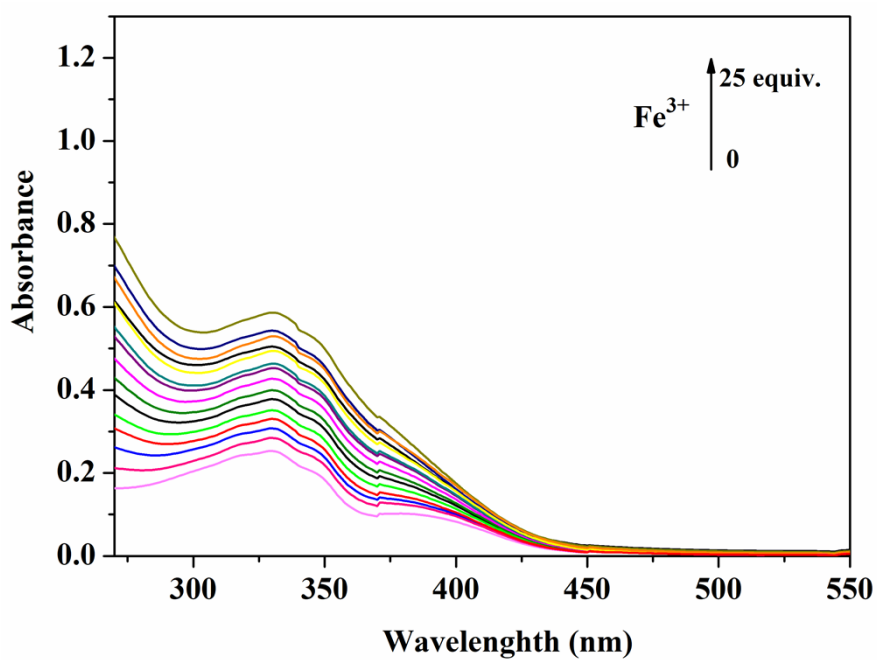

Fig. S10 Absorption spectrum of L[Al<sup>3+</sup>] with increasing addition of Fe<sup>3+</sup> (0-25 equiv.).

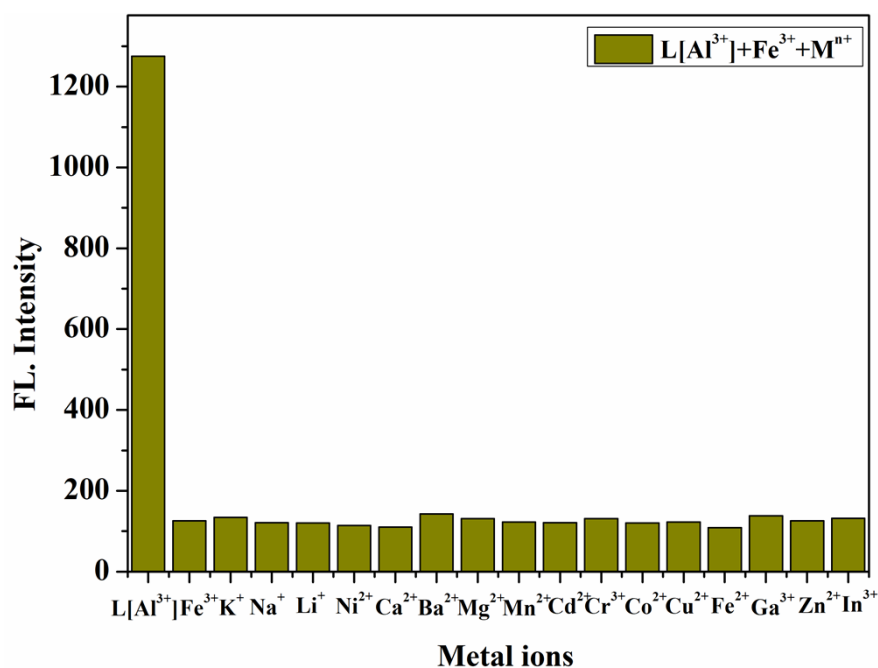

**Fig. S11** The fluorescence intensity of L[Al<sup>3+</sup>] towards Fe<sup>3+</sup> in the presence of other metal ions.

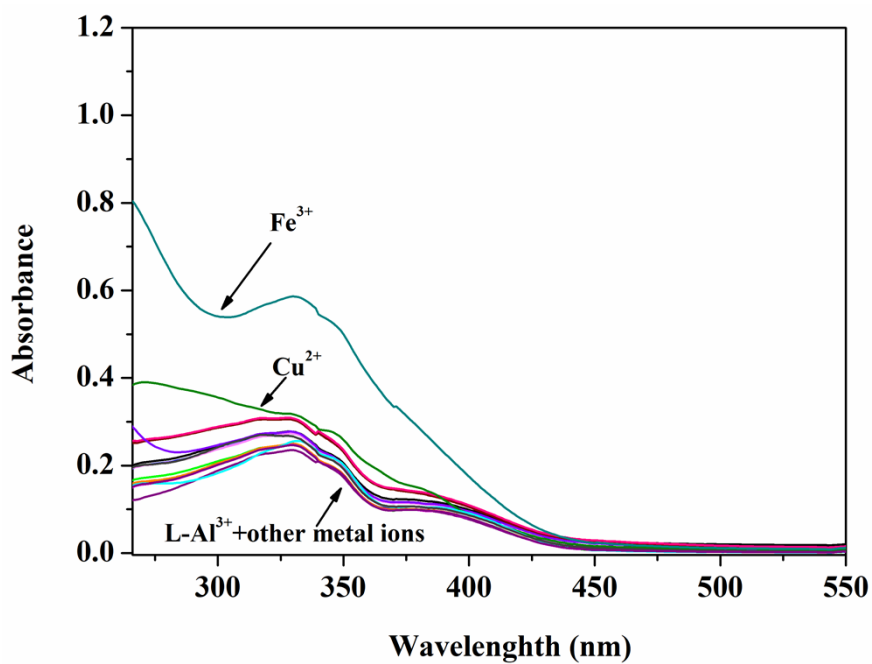

**Fig. S12** UV-vis absorption spectra of L[Al<sup>3+</sup>] upon addition of various metal ions.

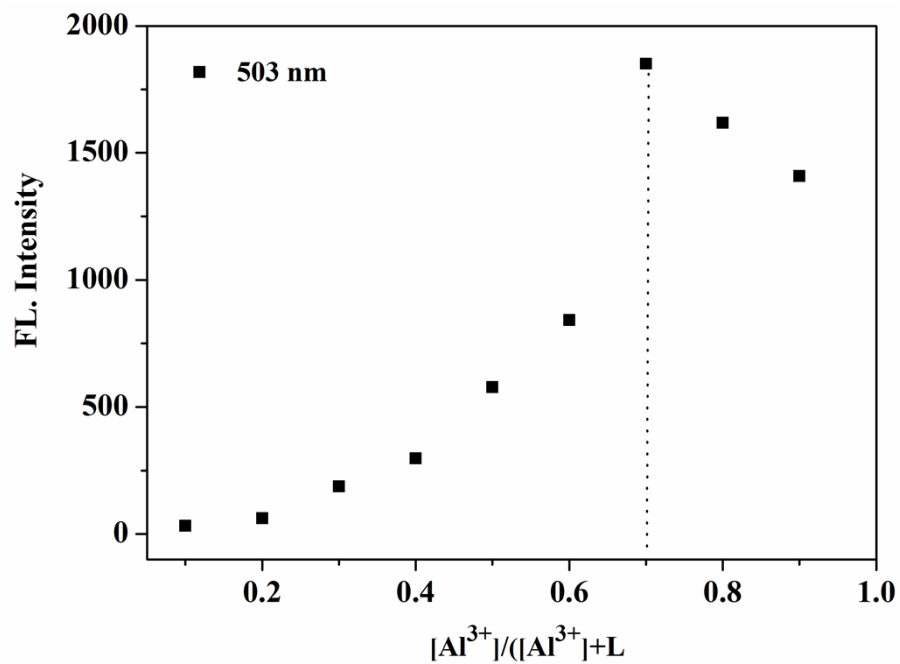

**Fig. S13** Job's Plot of L with  $Al^{3+}$  in DMSO/ $H_2O$  buffer solution (v/v = 9/1, tris = 10 mM, pH = 7.4).

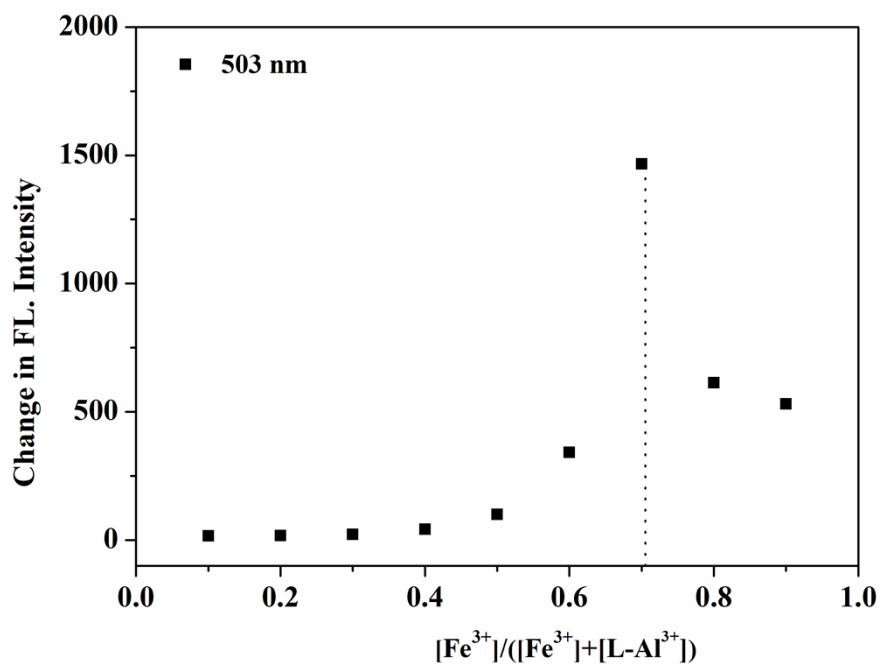

**Fig. S14** Job's Plot of  $L[Al^{3+}]$  with  $Fe^{3+}$  in DMSO/ $H_2O$  buffer solution (v/v = 9/1, tris = 10 mM, pH = 7.4).

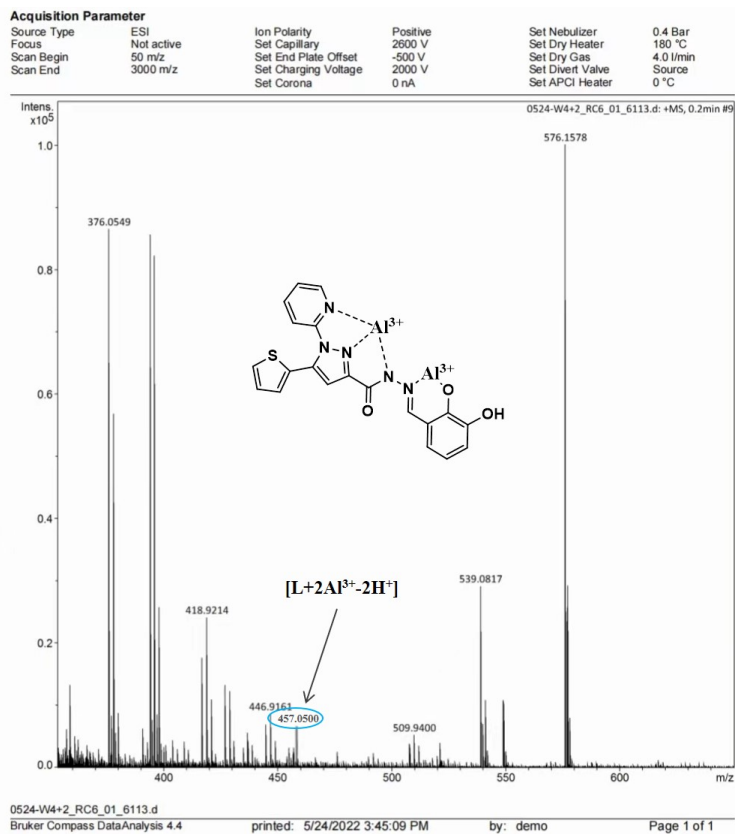

**Fig. S15** ESI-MS of compound **L** with addition of  $\text{Al}^{3+}$ .

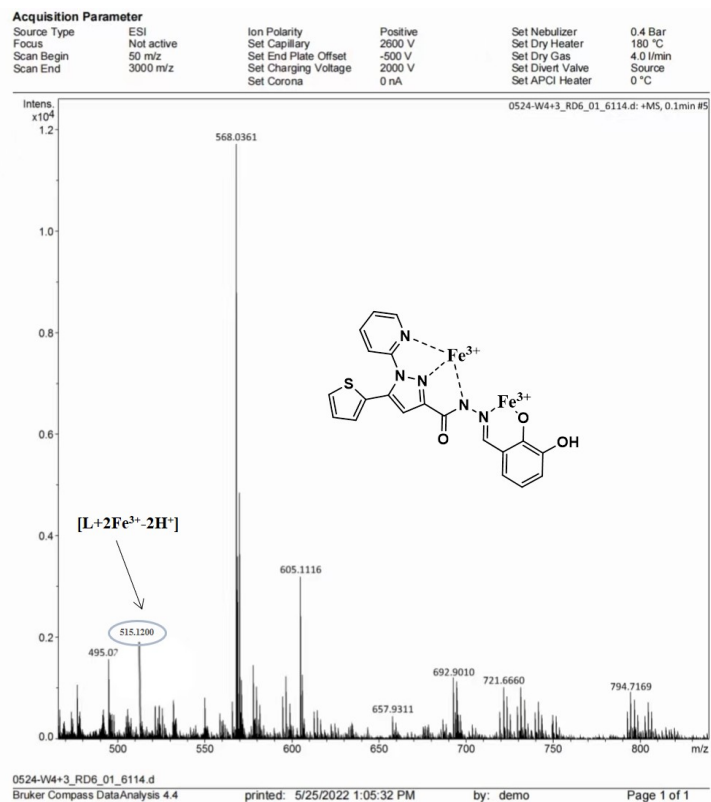

**Fig. S16** ESI-MS of compound **L** with addition of  $\text{Fe}^{3+}$ .

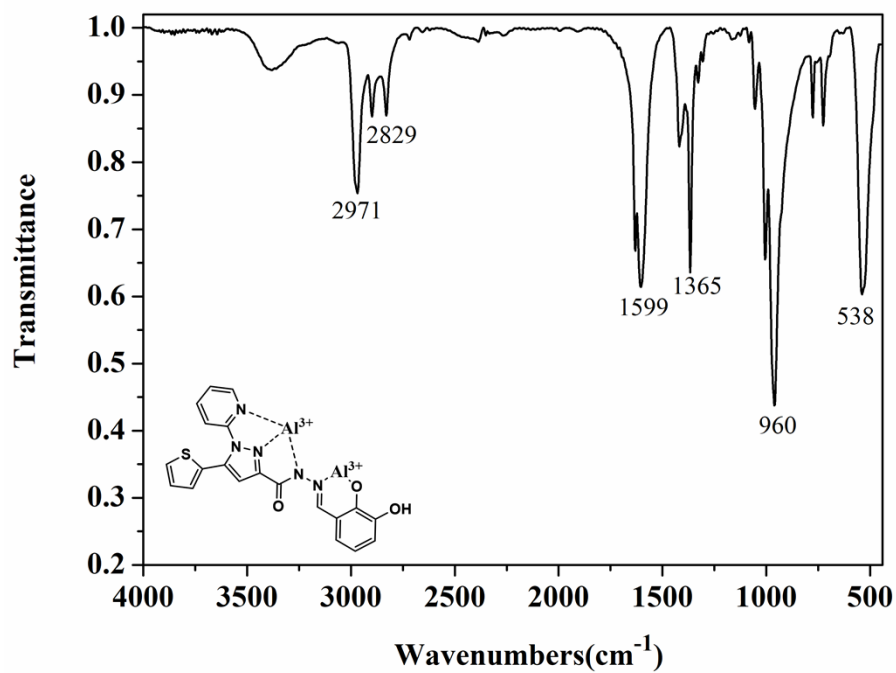

Fig. S17 FTIR of compound L with addition of  $\text{Al}^{3+}$ .

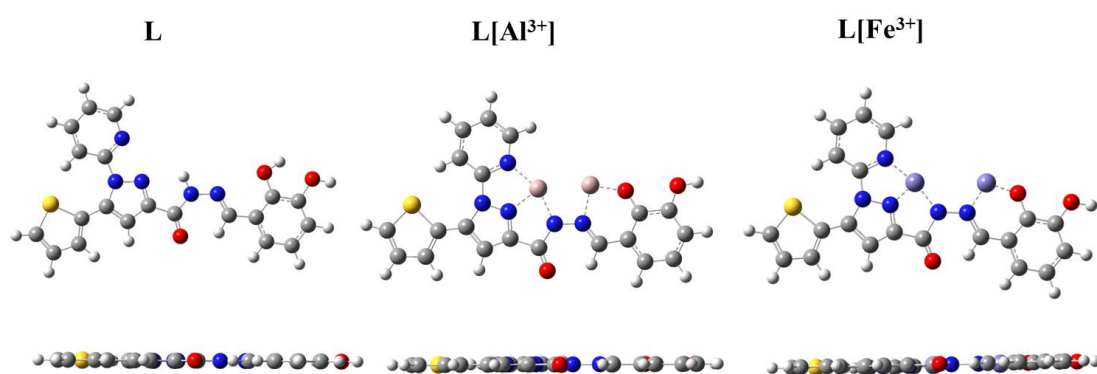

Fig. S18 The optimized geometry of L,  $\text{L}[\text{Al}^{3+}]$  and  $\text{L}[\text{Fe}^{3+}]$ .

**Table S1.** Comparison to this work with the published sensors for Al<sup>3+</sup> detection.

| Sensors                                                                                                                                                                    | Detection process | Detection limit                                        | Solvent Media                       | References |
|----------------------------------------------------------------------------------------------------------------------------------------------------------------------------|-------------------|--------------------------------------------------------|-------------------------------------|------------|
| 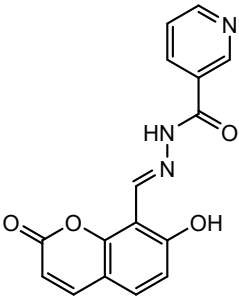                                                                                          | turn-on           | $2.51 \times 10^{-7}$ M                                | EtOH-HEPES<br>(95:5, v/v)           | [2]        |
|                                                                                           | turn-on           | $3.57 \times 10^{-8}$ M                                | DMF-H <sub>2</sub> O<br>(1:1, v/v)  | [4]        |
|                                                                                          | turn-on           | $1.82 \times 10^{-7}$ M                                | MeOH-H <sub>2</sub> O (3:1,<br>v/v) | [7]        |
|                                                                                         | turn-on           | $6.1 \times 10^{-8}$ M                                 | EtOH                                | [8]        |
|                                                                                         | turn-on           | $1.62 \times 10^{-6}$ M                                | MeOH-HEPES<br>Buffer<br>(9:1, v/v)  | [9]        |
| <br> | turn-on           | $1.48 \times 10^{-8}$ M<br><br>$4.23 \times 10^{-8}$ M | DMSO-H <sub>2</sub> O (1/2,<br>v/v) | [10]       |

|                                                                                   |         |                                |                                  |           |
|-----------------------------------------------------------------------------------|---------|--------------------------------|----------------------------------|-----------|
| 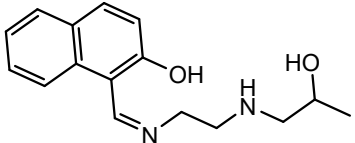 | turn-on | $1.8 \times 10^{-7} \text{ M}$ | MeOH                             | [11]      |
|  | /       | $1.1 \times 10^{-8} \text{ M}$ | DMSO-H <sub>2</sub> O (9:1, v/v) | This work |

**Table S2.** Comparison to this work with the published sensors for Fe<sup>3+</sup> detection.

| Sensors                                                                             | Detection process | Detection limit                 | Solvent Media                     | References |
|-------------------------------------------------------------------------------------|-------------------|---------------------------------|-----------------------------------|------------|
| 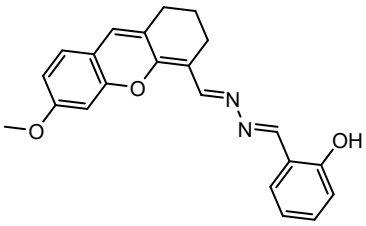  | turn-on           | $9.83 \times 10^{-8} \text{ M}$ | MeCN-Tris (2/1, v/v)              | [13]       |
|  | turn-off          | $1.96 \times 10^{-5} \text{ M}$ | DMF-Tris (1/1, v/v)               | [16]       |
|  | turn-off          | $1.37 \times 10^{-8} \text{ M}$ | DMSO-H <sub>2</sub> O (v/v = 3/7) | [17]       |
|  | turn-on           | $3.8 \times 10^{-7} \text{ M}$  | /                                 | [18]       |



|                                                                                   |          |                         |                                  |           |
|-----------------------------------------------------------------------------------|----------|-------------------------|----------------------------------|-----------|
| 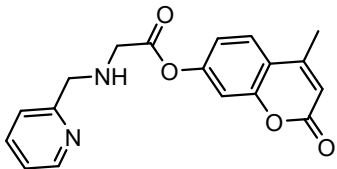 | turn-off | $3.2 \times 10^{-7}$ M  | H <sub>2</sub> O                 | [21]      |
|  | /        | $4.45 \times 10^{-8}$ M | DMSO/H <sub>2</sub> O (9:1, v/v) | This work |

**Table S3.** Optical properties of **L** in the absence/presence of Al<sup>3+</sup> or Fe<sup>3+</sup>.

| Compound                     | Quantum Yield | LOD                     | Association Constant                  |
|------------------------------|---------------|-------------------------|---------------------------------------|
| <b>L</b>                     | 0.071         | \                       | \                                     |
| <b>L</b> [Al <sup>3+</sup> ] | 0.26          | $1.1 \times 10^{-8}$ M  | $1.84 \times 10^{10}$ M <sup>-2</sup> |
| <b>L</b> [Fe <sup>3+</sup> ] | 0.0021        | $4.45 \times 10^{-8}$ M | $4.80 \times 10^{10}$ M <sup>-2</sup> |

**Table S4.** Determination of **L** to Al<sup>3+</sup> and Fe<sup>3+</sup> in tap water

| Ion              | Sample | Ion added<br>(mol L <sup>-1</sup> ) | Ion recovered<br>(mol L <sup>-1</sup> ) | Recovery<br>(%) | RSD<br>(%) |
|------------------|--------|-------------------------------------|-----------------------------------------|-----------------|------------|
| Al <sup>3+</sup> | 1      | $1 \times 10^{-5}$                  | $1.04 \times 10^{-5}$                   | 104.00          | 0.95       |
|                  | 2      | $2 \times 10^{-5}$                  | $1.92 \times 10^{-5}$                   | 96.00           | 0.52       |
|                  | 3      | $3 \times 10^{-5}$                  | $3.02 \times 10^{-5}$                   | 100.67          | 0.33       |
| Fe <sup>3+</sup> | 1      | $1 \times 10^{-5}$                  | $1.12 \times 10^{-5}$                   | 112.00          | 0.86       |
|                  | 2      | $2 \times 10^{-5}$                  | $1.94 \times 10^{-5}$                   | 97.00           | 0.49       |
|                  | 3      | $3 \times 10^{-5}$                  | $3.04 \times 10^{-5}$                   | 101.30          | 0.32       |
